# Supplementary material for: Quantitative Proteomics for the Identification of Differentially Expressed Proteins in the Extracellular Vesicles of Cervical Cancer Cells
Source: MDPI journal article supplement (doi:10.3390/v15030702), 2023-03-08

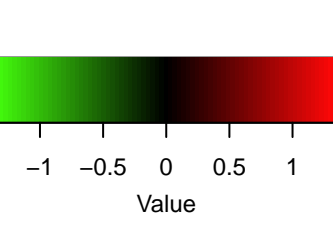

Figure S2. Heat map of the 322 differentially expressed proteins in EVs from HeLa and HaCaT cell lines. Up-regulated proteins are shown in red, while down-regulated proteins are shown in green. HeLa01 and HeLa02 correspond to the two biological replicates of the cervical cancer EVs group; HaCaT01 and HaCaT02 correspond to the two biological replicates of the control group.

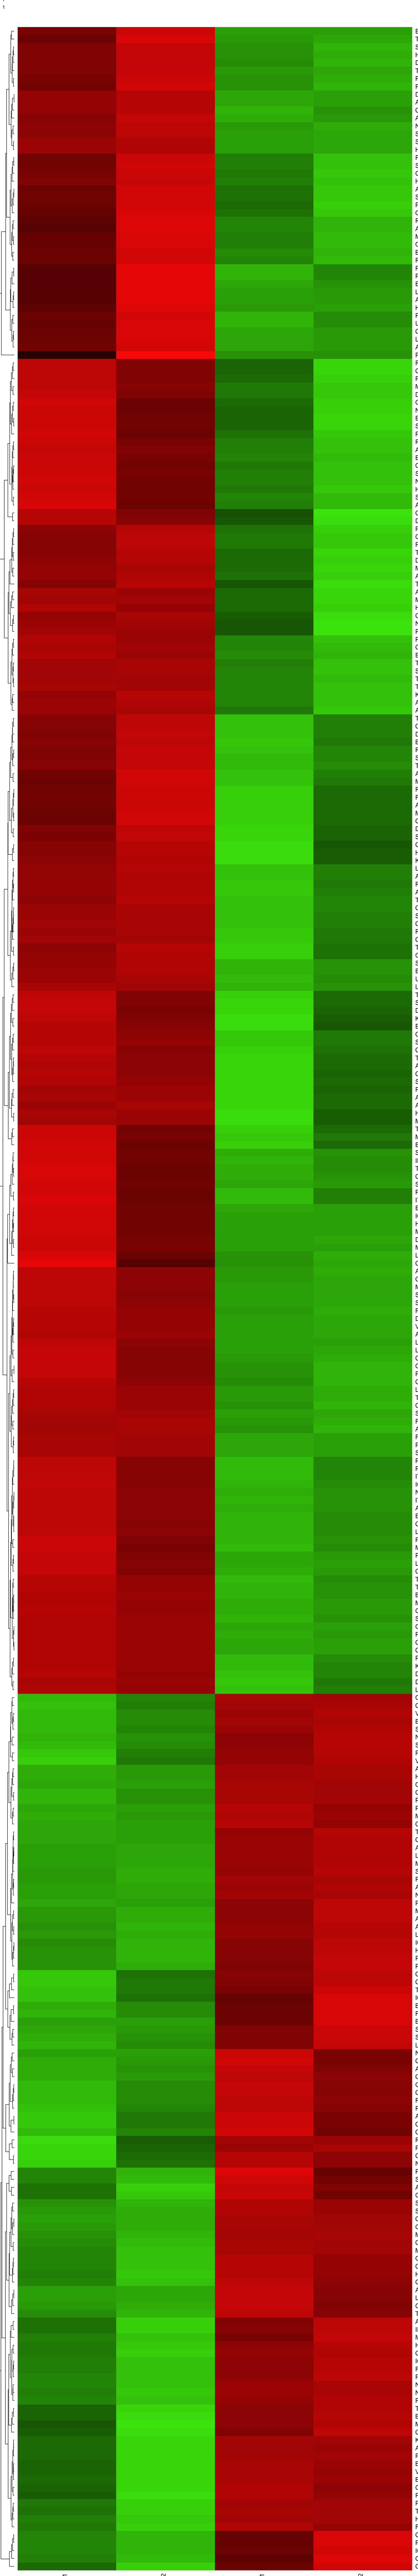

Supplement: s1 [file s1]
