# Supplementary material for: Quantitative Proteomics for the Identification of Differentially Expressed Proteins in the Extracellular Vesicles of Cervical Cancer Cells
Source: MDPI journal article supplement (doi:10.3390/v15030702), 2023-03-08
Supplement: s1 [file s1]

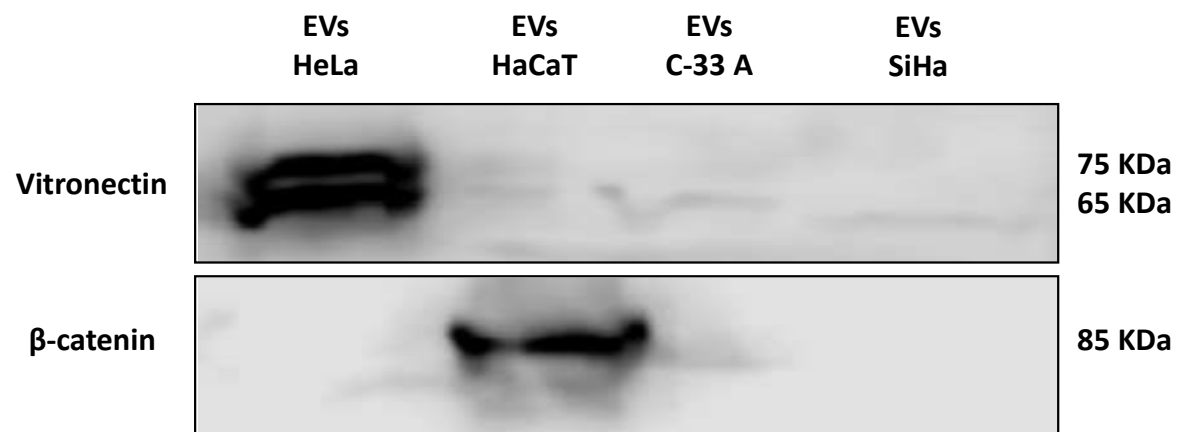

Figure S3. Validation of differentially expressed proteins by western blot. Vitronectin (up-regulated) and  $\beta$ -catenin (down-regulated) proteins evaluated in EVs from HeLa, C-33 A and SiHa cervical cancer cell lines, in addition to EVs from control HaCaT keratinocytes.
